# Supplementary material for: Identifying potential protein targets for toluene using a molecular similarity search, in silico docking and in vitro validation
Source: Royal Society of Chemistry journal article supplement (doi:10.1039/c5tx00009b), 2015-01-01
Supplement: c5tx00009b1.xlsx [file c5tx00009b1.xlsx]

## Sheet: TarTox_rpt
UniProt ID	Protein Name	Analog	Tanimoto Score
P05181	Cytochrome P450 2E1	meta-Xylene	1.941
P05181	Cytochrome P450 2E1	ortho-Xylene	1.844
P05181	Cytochrome P450 2E1	para-Xylene	1.941
P13584	Cytochrome P450 4B1	meta-Xylene	1.941
P13584	Cytochrome P450 4B1	ortho-Xylene	1.844
P13584	Cytochrome P450 4B1	para-Xylene	1.941
P32927	Cytokine receptor common subunit beta	Benzene	1.932
P54098	DNA polymerase subunit gamma-1	Benzene	1.932
Q9UHN1	DNA polymerase subunit gamma-2, mitochondrial	Benzene	1.932
P11388	DNA topoisomerase 2-alpha	Benzene	1.932
Q02880	DNA topoisomerase 2-beta	Benzene	1.932
P69905	Hemoglobin subunit alpha	Benzene	1.932
P68871	Hemoglobin subunit beta	Benzene	1.932
P02042	Hemoglobin subunit delta	Benzene	1.932
P02100	Hemoglobin subunit epsilon	Benzene	1.932
P69891	Hemoglobin subunit gamma-1	Benzene	1.932
P69892	Hemoglobin subunit gamma-2	Benzene	1.932
P09105	Hemoglobin subunit theta-1	Benzene	1.932
P02008	Hemoglobin subunit zeta	Benzene	1.932
Q13547	Histone deacetylase 1	Benzenetricarbonylchromium	1.932
Q13547	Histone deacetylase 1	Dibenzenechromium	1.932
P07305	Histone H1.0	Benzene	1.932
Q02539	Histone H1.1	Benzene	1.932
P16403	Histone H1.2	Benzene	1.932
P16402	Histone H1.3	Benzene	1.932
P10412	Histone H1.4	Benzene	1.932
P16401	Histone H1.5	Benzene	1.932
Q8IZA3	Histone H1oo	Benzene	1.932
P22492	Histone H1t	Benzene	1.932
Q92522	Histone H1x	Benzene	1.932
P0C0S8	Histone H2A type 1	Benzene	1.932
Q96QV6	Histone H2A type 1-A	Benzene	1.932
P04908	Histone H2A type 1-B/E	Benzene	1.932
Q93077	Histone H2A type 1-C	Benzene	1.932
P20671	Histone H2A type 1-D	Benzene	1.932
Q96KK5	Histone H2A type 1-H	Benzene	1.932
Q99878	Histone H2A type 1-J	Benzene	1.932
Q6FI13	Histone H2A type 2-A	Benzene	1.932
Q8IUE6	Histone H2A type 2-B	Benzene	1.932
Q16777	Histone H2A type 2-C	Benzene	1.932
Q7L7L0	Histone H2A type 3	Benzene	1.932
Q9BTM1	Histone H2A.J	Benzene	1.932
Q71UI9	Histone H2A.V	Benzene	1.932
P16104	Histone H2A.x	Benzene	1.932
P0C0S5	Histone H2A.Z	Benzene	1.932
P0C5Y9	Histone H2A-Bbd type 1	Benzene	1.932
P0C5Z0	Histone H2A-Bbd type 2/3	Benzene	1.932
Q96A08	Histone H2B type 1-A	Benzene	1.932
P33778	Histone H2B type 1-B	Benzene	1.932
P62807	Histone H2B type 1-C/E/F/G/I	Benzene	1.932
P58876	Histone H2B type 1-D	Benzene	1.932
Q93079	Histone H2B type 1-H	Benzene	1.932
P06899	Histone H2B type 1-J	Benzene	1.932
O60814	Histone H2B type 1-K	Benzene	1.932
Q99880	Histone H2B type 1-L	Benzene	1.932
Q99879	Histone H2B type 1-M	Benzene	1.932
Q99877	Histone H2B type 1-N	Benzene	1.932
P23527	Histone H2B type 1-O	Benzene	1.932
Q16778	Histone H2B type 2-E	Benzene	1.932
Q5QNW6	Histone H2B type 2-F	Benzene	1.932
Q8N257	Histone H2B type 3-B	Benzene	1.932
P0C1H6	Histone H2B type F-M	Benzene	1.932
P57053	Histone H2B type F-S	Benzene	1.932
Q7Z2G1	Histone H2B type W-T	Benzene	1.932
P68431	Histone H3.1	Benzene	1.932
Q16695	Histone H3.1t	Benzene	1.932
Q71DI3	Histone H3.2	Benzene	1.932
P84243	Histone H3.3	Benzene	1.932
Q6NXT2	Histone H3.3C	Benzene	1.932
P49450	Histone H3-like centromeric protein A	Benzene	1.932
P62805	Histone H4	Benzene	1.932
Q99525	Histone H4-like protein type G	Benzene	1.932
Q14872	Metal regulatory transcription factor 1	Benzenetricarbonylchromium	1.932
Q14872	Metal regulatory transcription factor 1	Dibenzenechromium	1.932
P28482	Mitogen-activated protein kinase 1	Benzenetricarbonylchromium	1.932
P28482	Mitogen-activated protein kinase 1	Dibenzenechromium	1.932
P27361	Mitogen-activated protein kinase 3	Benzenetricarbonylchromium	1.932
P27361	Mitogen-activated protein kinase 3	Dibenzenechromium	1.932
Q6DRA6	Putative histone H2B type 2-D	Benzene	1.932
A6NKZ8	Putative tubulin beta chain-like protein ENSP00000290377	Benzene	1.932
Q99867	Putative tubulin beta-4q chain	Benzene	1.932
Q9H853	Putative tubulin-like protein alpha-4B	Benzene	1.932
P23921	Ribonucleoside-diphosphate reductase large subunit	Benzene	1.932
P31350	Ribonucleoside-diphosphate reductase subunit M2	Benzene	1.932
Q7LG56	Ribonucleoside-diphosphate reductase subunit M2 B	Benzene	1.932
P02768	Serum albumin	Benzene	1.932
Q75WM6	Testis-specific H1 histone	Benzene	1.932
A6NHL2	Tubulin alpha chain-like 3	Benzene	1.932
Q71U36	Tubulin alpha-1A chain	Benzene	1.932
P68363	Tubulin alpha-1B chain	Benzene	1.932
Q9BQE3	Tubulin alpha-1C chain	Benzene	1.932
Q13748	Tubulin alpha-3C/D chain	Benzene	1.932
Q6PEY2	Tubulin alpha-3E chain	Benzene	1.932
P68366	Tubulin alpha-4A chain	Benzene	1.932
Q9NY65	Tubulin alpha-8 chain	Benzene	1.932
P07437	Tubulin beta chain	Benzene	1.932
Q9H4B7	Tubulin beta-1 chain	Benzene	1.932
Q13885	Tubulin beta-2A chain	Benzene	1.932
Q9BVA1	Tubulin beta-2B chain	Benzene	1.932
Q13509	Tubulin beta-3 chain	Benzene	1.932
P04350	Tubulin beta-4A chain	Benzene	1.932
P68371	Tubulin beta-4B chain	Benzene	1.932
Q9BUF5	Tubulin beta-6 chain	Benzene	1.932
Q3ZCM7	Tubulin beta-8 chain	Benzene	1.932
A6NNZ2	Tubulin beta-8 chain-like protein LOC260334	Benzene	1.932
Q9UJT1	Tubulin delta chain	Benzene	1.932
Q9UJT0	Tubulin epsilon chain	Benzene	1.932
P23258	Tubulin gamma-1 chain	Benzene	1.932
Q9NRH3	Tubulin gamma-2 chain	Benzene	1.932
