# Supplementary material for: Identifying potential protein targets for toluene using a molecular similarity search, in silico docking and in vitro validation
Source: Royal Society of Chemistry journal article supplement (doi:10.1039/c5tx00009b), 2015-01-01
Supplement: c5tx00009b2.xlsx [file c5tx00009b2.xlsx]

## Sheet: TarTox_rpt
UniProt ID	Protein name	Toxins
P98194	Calcium-transporting ATPase type 2C member 1	Ethylbenzene
O75185	Calcium-transporting ATPase type 2C member 2	Ethylbenzene
P05181	Cytochrome P450 2E1	para-Xylene,meta-Xylene,ortho-Xylene
P13584	Cytochrome P450 4B1	para-Xylene,meta-Xylene,ortho-Xylene
P32927	Cytokine receptor common subunit beta	Benzene,Styrene,Azulene
P54098	DNA polymerase subunit gamma-1	Benzene
Q9UHN1	DNA polymerase subunit gamma-2, mitochondrial	Benzene
P11388	DNA topoisomerase 2-alpha	Benzene
Q02880	DNA topoisomerase 2-beta	Benzene
O15540	Fatty acid-binding protein, brain	Bromobenzene
P28161	Glutathione S-transferase Mu 2	Bromobenzene
Q14749	Glycine N-methyltransferase	Azulene
P69905	Hemoglobin subunit alpha	Benzene
P68871	Hemoglobin subunit beta	Benzene
P02042	Hemoglobin subunit delta	Benzene
P02100	Hemoglobin subunit epsilon	Benzene
P69891	Hemoglobin subunit gamma-1	Benzene
P69892	Hemoglobin subunit gamma-2	Benzene
P09105	Hemoglobin subunit theta-1	Benzene
P02008	Hemoglobin subunit zeta	Benzene
P07305	Histone H1.0	Benzene
Q02539	Histone H1.1	Benzene
P16403	Histone H1.2	Benzene
P16402	Histone H1.3	Benzene
P10412	Histone H1.4	Benzene
P16401	Histone H1.5	Benzene
Q8IZA3	Histone H1oo	Benzene
P22492	Histone H1t	Benzene
Q92522	Histone H1x	Benzene
P0C0S8	Histone H2A type 1	Benzene
Q96QV6	Histone H2A type 1-A	Benzene
P04908	Histone H2A type 1-B/E	Benzene
Q93077	Histone H2A type 1-C	Benzene
P20671	Histone H2A type 1-D	Benzene
Q96KK5	Histone H2A type 1-H	Benzene
Q99878	Histone H2A type 1-J	Benzene
Q6FI13	Histone H2A type 2-A	Benzene
Q8IUE6	Histone H2A type 2-B	Benzene
Q16777	Histone H2A type 2-C	Benzene
Q7L7L0	Histone H2A type 3	Benzene
Q9BTM1	Histone H2A.J	Benzene
Q71UI9	Histone H2A.V	Benzene
P16104	Histone H2A.x	Benzene
P0C0S5	Histone H2A.Z	Benzene
P0C5Y9	Histone H2A-Bbd type 1	Benzene
P0C5Z0	Histone H2A-Bbd type 2/3	Benzene
Q96A08	Histone H2B type 1-A	Benzene
P33778	Histone H2B type 1-B	Benzene
P62807	Histone H2B type 1-C/E/F/G/I	Benzene
P58876	Histone H2B type 1-D	Benzene
Q93079	Histone H2B type 1-H	Benzene
P06899	Histone H2B type 1-J	Benzene
O60814	Histone H2B type 1-K	Benzene
Q99880	Histone H2B type 1-L	Benzene
Q99879	Histone H2B type 1-M	Benzene
Q99877	Histone H2B type 1-N	Benzene
P23527	Histone H2B type 1-O	Benzene
Q16778	Histone H2B type 2-E	Benzene
Q5QNW6	Histone H2B type 2-F	Benzene
Q8N257	Histone H2B type 3-B	Benzene
P0C1H6	Histone H2B type F-M	Benzene
P57053	Histone H2B type F-S	Benzene
Q7Z2G1	Histone H2B type W-T	Benzene
P68431	Histone H3.1	Benzene
Q16695	Histone H3.1t	Benzene
Q71DI3	Histone H3.2	Benzene
P84243	Histone H3.3	Benzene
Q6NXT2	Histone H3.3C	Benzene
P49450	Histone H3-like centromeric protein A	Benzene
P62805	Histone H4	Benzene
Q99525	Histone H4-like protein type G	Benzene
P20020	Plasma membrane calcium-transporting ATPase 1	Ethylbenzene
Q01814	Plasma membrane calcium-transporting ATPase 2	Ethylbenzene
Q16720	Plasma membrane calcium-transporting ATPase 3	Ethylbenzene
P23634	Plasma membrane calcium-transporting ATPase 4	Ethylbenzene
Q6DRA6	Putative histone H2B type 2-D	Benzene
A6NKZ8	Putative tubulin beta chain-like protein ENSP00000290377	Benzene
Q99867	Putative tubulin beta-4q chain	Benzene
Q9H853	Putative tubulin-like protein alpha-4B	Benzene
Q15493	Regucalcin	Bromobenzene
P23921	Ribonucleoside-diphosphate reductase large subunit	Benzene
P31350	Ribonucleoside-diphosphate reductase subunit M2	Benzene
Q7LG56	Ribonucleoside-diphosphate reductase subunit M2 B	Benzene
O14983	Sarcoplasmic/endoplasmic reticulum calcium ATPase 1	Ethylbenzene
P16615	Sarcoplasmic/endoplasmic reticulum calcium ATPase 2	Ethylbenzene
Q93084	Sarcoplasmic/endoplasmic reticulum calcium ATPase 3	Ethylbenzene
Q13228	Selenium-binding protein 1	Bromobenzene
P02768	Serum albumin	Benzene
P05023	Sodium/potassium-transporting ATPase subunit alpha-1	Ethylbenzene
P50993	Sodium/potassium-transporting ATPase subunit alpha-2	Ethylbenzene
P13637	Sodium/potassium-transporting ATPase subunit alpha-3	Ethylbenzene
Q13733	Sodium/potassium-transporting ATPase subunit alpha-4	Ethylbenzene
P05026	Sodium/potassium-transporting ATPase subunit beta-1	Ethylbenzene
P14415	Sodium/potassium-transporting ATPase subunit beta-2	Ethylbenzene
P54709	Sodium/potassium-transporting ATPase subunit beta-3	Ethylbenzene
P54710	Sodium/potassium-transporting ATPase subunit gamma	Ethylbenzene
Q75WM6	Testis-specific H1 histone	Benzene
P10599	Thioredoxin	Bromobenzene
Q99757	Thioredoxin, mitochondrial	Bromobenzene
P02766	Transthyretin	Bromobenzene
P60174	Triosephosphate isomerase	Bromobenzene
A6NHL2	Tubulin alpha chain-like 3	Benzene
Q71U36	Tubulin alpha-1A chain	Benzene
P68363	Tubulin alpha-1B chain	Benzene
Q9BQE3	Tubulin alpha-1C chain	Benzene
Q13748	Tubulin alpha-3C/D chain	Benzene
Q6PEY2	Tubulin alpha-3E chain	Benzene
P68366	Tubulin alpha-4A chain	Benzene
Q9NY65	Tubulin alpha-8 chain	Benzene
P07437	Tubulin beta chain	Benzene
Q9H4B7	Tubulin beta-1 chain	Benzene
Q13885	Tubulin beta-2A chain	Benzene
Q9BVA1	Tubulin beta-2B chain	Benzene
Q13509	Tubulin beta-3 chain	Benzene
P04350	Tubulin beta-4A chain	Benzene
P68371	Tubulin beta-4B chain	Benzene
Q9BUF5	Tubulin beta-6 chain	Benzene
Q3ZCM7	Tubulin beta-8 chain	Benzene
A6NNZ2	Tubulin beta-8 chain-like protein LOC260334	Benzene
Q9UJT1	Tubulin delta chain	Benzene
Q9UJT0	Tubulin epsilon chain	Benzene
P23258	Tubulin gamma-1 chain	Benzene
Q9NRH3	Tubulin gamma-2 chain	Benzene
O60701	UDP-glucose 6-dehydrogenase	Bromobenzene
