# Supplementary material for: Identifying potential protein targets for toluene using a molecular similarity search, in silico docking and in vitro validation
Source: Royal Society of Chemistry journal article supplement (doi:10.1039/c5tx00009b), 2015-01-01
Supplement: c5tx00009b3.xlsx [file c5tx00009b3.xlsx]

## Sheet: Targets_ADT_pdbs_uniq
PDB ID	UniProt ID	Protein name
1a00	P69905	Hemoglobin subunit alpha
1a00	P68871	Hemoglobin subunit beta
1a01	P69905	Hemoglobin subunit alpha
1a01	P68871	Hemoglobin subunit beta
1a0u	P69905	Hemoglobin subunit alpha
1a0u	P68871	Hemoglobin subunit beta
1a0z	P69905	Hemoglobin subunit alpha
1a0z	P68871	Hemoglobin subunit beta
1a3n	P69905	Hemoglobin subunit alpha
1a3n	P68871	Hemoglobin subunit beta
1a9w	P69905	Hemoglobin subunit alpha
1a9w	P02100	Hemoglobin subunit epsilon
1abw	P69905	Hemoglobin subunit alpha
1abw	P68871	Hemoglobin subunit beta
1aby	P69905	Hemoglobin subunit alpha
1aby	P68871	Hemoglobin subunit beta
1aj9	P69905	Hemoglobin subunit alpha
1aj9	P68871	Hemoglobin subunit beta
1ao6	P02768	Serum albumin
1bj5	P02768	Serum albumin
1bke	P02768	Serum albumin
1bm0	P02768	Serum albumin
1c7c	P69905	Hemoglobin subunit alpha
1c7c	P68871	Hemoglobin subunit beta
1c7d	P69905	Hemoglobin subunit alpha
1c7d	P68871	Hemoglobin subunit beta
1cbl	P68871	Hemoglobin subunit beta
1cbm	P68871	Hemoglobin subunit beta
1ch4	P68871	Hemoglobin subunit beta
1e7a	P02768	Serum albumin
1e7b	P02768	Serum albumin
1e7c	P02768	Serum albumin
1e7e	P02768	Serum albumin
1e7f	P02768	Serum albumin
1egj	P32927	Cytokine receptor common subunit beta
1fdh	P69905	Hemoglobin subunit alpha
1fdh	P69892	Hemoglobin subunit gamma-2
1gh7	P32927	Cytokine receptor common subunit beta
1hco	P69905	Hemoglobin subunit alpha
1hco	P68871	Hemoglobin subunit beta
1hho	P69905	Hemoglobin subunit alpha
1hho	P68871	Hemoglobin subunit beta
1i3e	P69891	Hemoglobin subunit gamma-1
1ird	P69905	Hemoglobin subunit alpha
1ird	P68871	Hemoglobin subunit beta
1j3y	P69905	Hemoglobin subunit alpha
1j3y	P68871	Hemoglobin subunit beta
1j3z	P69905	Hemoglobin subunit alpha
1j3z	P68871	Hemoglobin subunit beta
1j40	P69905	Hemoglobin subunit alpha
1j40	P68871	Hemoglobin subunit beta
1j41	P69905	Hemoglobin subunit alpha
1j41	P68871	Hemoglobin subunit beta
1jeb	P02008	Hemoglobin subunit zeta
1jy7	P69905	Hemoglobin subunit alpha
1jy7	P68871	Hemoglobin subunit beta
1k1k	P69905	Hemoglobin subunit alpha
1k1k	P68871	Hemoglobin subunit beta
1lfl	P69905	Hemoglobin subunit alpha
1lfl	P68871	Hemoglobin subunit beta
1o1j	P69905	Hemoglobin subunit alpha
1o1j	P68871	Hemoglobin subunit beta
1shr	P69905	Hemoglobin subunit alpha
1shr	P02042	Hemoglobin subunit delta
1si4	P69905	Hemoglobin subunit alpha
1si4	P02042	Hemoglobin subunit delta
1uiw	P69905	Hemoglobin subunit alpha
1uiw	P68871	Hemoglobin subunit beta
1y01	P69905	Hemoglobin subunit alpha
1z5v	P23258	Tubulin gamma-1 chain
1z5w	P23258	Tubulin gamma-1 chain
1z8u	P69905	Hemoglobin subunit alpha
1zxm	P11388	DNA topoisomerase 2-alpha
1zxn	P11388	DNA topoisomerase 2-alpha
2b2t	P68431	Histone H3.1
2b2u	P68431	Histone H3.1
2b2v	P68431	Histone H3.1
2b2w	P68431	Histone H3.1
2bqz	P62805	Histone H4
2c1j	P68431	Histone H3.1
2c1n	P68431	Histone H3.1
2d31	P16104	Histone H2AX
2dyp	P16104	Histone H2AX
2g4c	Q9UHN1	DNA polymerase subunit gamma-2, mitochondrial
2gys	P32927	Cytokine receptor common subunit beta
2ri7	P68431	Histone H3.1
2uw2	P31350	Ribonucleoside-diphosphate reductase subunit M2
2v1d	Q16695	Histone H3.1t
2vuf	P02768	Serum albumin
2vux	Q7LG56	Ribonucleoside-diphosphate reductase subunit M2 B
2w72	P69905	Hemoglobin subunit alpha
2w72	P68871	Hemoglobin subunit beta
2wgh	P23921	Ribonucleoside-diphosphate reductase large subunit
2x4w	Q71DI3	Histone H3.2
2x4x	Q71DI3	Histone H3.2
2x4y	Q71DI3	Histone H3.2
2ybp	Q16695	Histone H3.1t
2ybs	Q16695	Histone H3.1t
3ask	P84243	Histone H3.3
3avr	P68431	Histone H3.1
3b75	P69905	Hemoglobin subunit alpha
3b75	P68871	Hemoglobin subunit beta
3b95	P68431	Histone H3.1
3cb2	P23258	Tubulin gamma-1 chain
3cfs	P62805	Histone H4
3cfv	P62805	Histone H4
3cxe	P32927	Cytokine receptor common subunit beta
3db3	Q71DI3	Histone H3.2
3e4e	P05181	Cytochrome P450 2E1
3e6i	P05181	Cytochrome P450 2E1
3f9w	P62805	Histone H4
3f9x	P62805	Histone H4
3f9z	P62805	Histone H4
3gph	P05181	Cytochrome P450 2E1
3hf1	Q7LG56	Ribonucleoside-diphosphate reductase subunit M2 B
3hnc	P23921	Ribonucleoside-diphosphate reductase large subunit
3hnd	P23921	Ribonucleoside-diphosphate reductase large subunit
3hne	P23921	Ribonucleoside-diphosphate reductase large subunit
3hnf	P23921	Ribonucleoside-diphosphate reductase large subunit
3ia3	P69905	Hemoglobin subunit alpha
3ikl	Q9UHN1	DNA polymerase subunit gamma-2, mitochondrial
3ikm	P54098	DNA polymerase subunit gamma-1
3ikm	Q9UHN1	DNA polymerase subunit gamma-2, mitochondrial
3koh	P05181	Cytochrome P450 2E1
3kv4	Q6NXT2	Histone H3.3C
3lc4	P05181	Cytochrome P450 2E1
3mo8	Q71DI3	Histone H3.2
3nqj	P49450	Histone H3-like centromeric protein A
3nqj	P62805	Histone H4
3nqu	P49450	Histone H3-like centromeric protein A
3nqu	P62805	Histone H4
3o34	P68431	Histone H3.1
3o35	P68431	Histone H3.1
3o36	P62805	Histone H4
3o37	P68431	Histone H3.1
3olj	P31350	Ribonucleoside-diphosphate reductase subunit M2
3ql9	P84243	Histone H3.3
3qla	P84243	Histone H3.3
3qlc	P84243	Histone H3.3
3qnz	P07437	Tubulin beta chain
3qo0	P07437	Tubulin beta chain
3qzs	P62805	Histone H4
3qzt	P62805	Histone H4
3qzv	P62805	Histone H4
3r45	P49450	Histone H3-like centromeric protein A
3r45	P62805	Histone H4
3r93	Q71DI3	Histone H3.2
3rig	P68431	Histone H3.1
3shv	P16104	Histone H2AX
3sqd	P16104	Histone H2AX
3szm	P16104	Histone H2AX
3t3z	P05181	Cytochrome P450 2E1
3t6r	Q16695	Histone H3.1t
3tzd	P10412	Histone H1.4
3u3z	P16104	Histone H2AX
3u4s	P68431	Histone H3.1
3u5n	P68431	Histone H3.1
3u5o	P68431	Histone H3.1
3u5p	P68431	Histone H3.1
3uee	P68431	Histone H3.1
3uef	P68431	Histone H3.1
3uig	P68431	Histone H3.1
3uii	P68431	Histone H3.1
3uik	P68431	Histone H3.1
3uvw	P62805	Histone H4
3uvy	P62805	Histone H4
3uw9	P62805	Histone H4
3v43	P68431	Histone H3.1
3vpm	P31350	Ribonucleoside-diphosphate reductase subunit M2
3vpn	P31350	Ribonucleoside-diphosphate reductase subunit M2
3vpo	P31350	Ribonucleoside-diphosphate reductase subunit M2
3w4u	P68871	Hemoglobin subunit beta
3w4u	P02008	Hemoglobin subunit zeta
3zvy	P68431	Histone H3.1
4a0j	P68431	Histone H3.1
4a0n	P68431	Histone H3.1
4a7j	Q16695	Histone H3.1t
4djn	Q7LG56	Ribonucleoside-diphosphate reductase subunit M2 B
4edu	Q9BTM1	Histone H2A.J
4f4u	P68431	Histone H3.1
4f56	P68431	Histone H3.1
4fwf	P68431	Histone H3.1
4gne	P84243	Histone H3.3
4gnf	P84243	Histone H3.3
4gng	P84243	Histone H3.3
4gqb	P62805	Histone H4
4gu0	P84243	Histone H3.3
4gur	P84243	Histone H3.3
4gus	P84243	Histone H3.3
4gy5	P84243	Histone H3.3
4h9n	P84243	Histone H3.3
4h9n	P62805	Histone H4
4h9o	P84243	Histone H3.3
4h9o	P62805	Histone H4
4h9p	P84243	Histone H3.3
4h9p	P62805	Histone H4
4h9q	P84243	Histone H3.3
4h9q	P62805	Histone H4
4h9r	P84243	Histone H3.3
4h9r	P62805	Histone H4
4h9s	P84243	Histone H3.3
4h9s	P62805	Histone H4
4hga	P84243	Histone H3.3
4hga	P62805	Histone H4
4hon	P68431	Histone H3.1
4i51	P68431	Histone H3.1
